# Supplementary material for: Electrochemistry and electrocatalysis of myoglobin on carbon coated Fe3O4 nanospindle modified carbon ionic liquid electrode
Source: Royal Society of Chemistry journal article supplement (doi:10.1039/c2ra20362f), 2012-01-01
Supplement: c2ra20362f.pdf [file c2ra20362f.pdf]

## *Supporting Information*

### **Electrochemistry and electrocatalysis of myoglobin on carbon coated Fe<sub>3</sub>O<sub>4</sub> Nanospindles modified carbon ionic liquid electrode**

Yan Ke<sup>1#</sup>, Yan Zeng<sup>1#</sup>, Xuli Pu<sup>2</sup>, Xu Wu<sup>1</sup>, Linfang Li<sup>3</sup>, Zhihong Zhu<sup>1\*</sup>,  
Ying Yu<sup>1\*</sup>

1. Institute of Nano-science and Nano-technology, College of Physical Science and Technology, Central China Normal University, Wuhan 430079, P.R. China;
2. Xiamen Entry-Exit Inspection and Quarantine Bureau of the Peoples Republic of China, Xiamen 361012, P.R. China
3. College of Chemistry and Molecular Engineering, Qingdao University of Science and Technology, Qingdao 266042, P. R. China

\* Corresponding authors.

E-mail addresses: zh Zhu@phy.ccnu.edu.cn (Z.Zhu), yuying@phy.ccnu.edu.cn(Y.Yu).

# Equal contributions to this work.

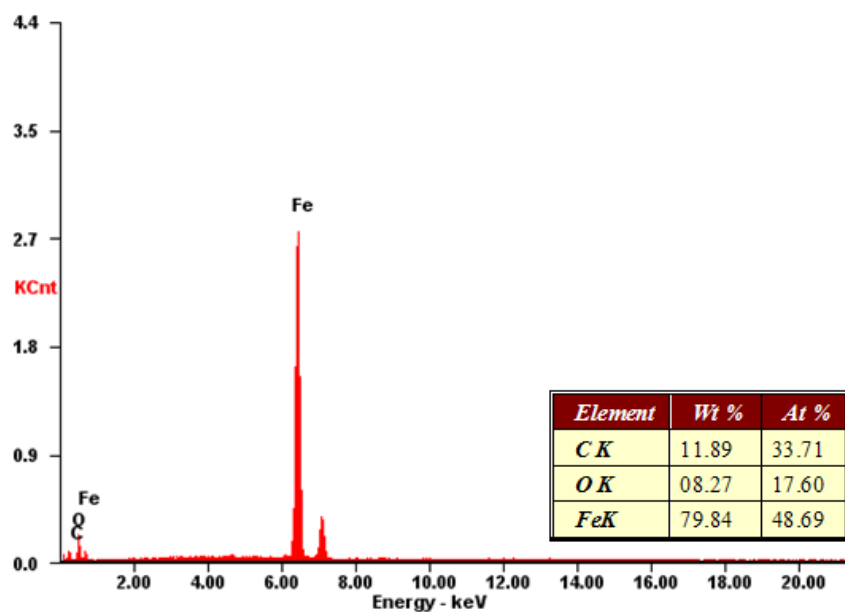

Figure S1. Energy-dispersive X-ray spectroscopy (EDX) spectrum of carbon coated Fe<sub>3</sub>O<sub>4</sub> Nanospindles
